# Supplementary material for: Application of a multilayer perceptron artificial neural network for identification of peach cultivars based on physical characteristics
Source: PeerJ. 2021 Jun 17;9:e11529. doi: 10.7717/peerj.11529 (PMC11563042; doi:10.7717/peerj.11529)
Supplement: Supplemental Information 1 [file peerj-09-11529-s001.csv]

				L*	a*	b*	Firmness	polar diameter	cross diamter
				(---)	(---)	(---)	(Lb/inch2)	(cm)	(cm)
Dixon	V1	R1	1	54.65	19.34	48.14	5.06	5.95	5.54
Dixon	V1	R2	1	54.99	17.01	49.21	4.89	5.92	5.54
Dixon	V1	R3	1	53.97	17.51	51.37	4.94	5.91	5.54
Dixon	V1	R4	1	53.80	16.82	48.82	3.61	5.90	5.53
Dixon	V1	R5	1	55.34	18.47	50.91	4.82	5.92	5.54
Dixon	V1	R6	1	55.30	17.03	48.94	4.69	5.91	5.55
Dixon	V1	R7	1	51.66	18.35	50.85	4.73	5.91	5.55
Dixon	V1	R8	1	54.94	16.62	49.99	5.03	5.91	5.57
Dixon	V1	R9	1	55.75	18.09	48.18	3.92	5.90	5.54
Dixon	V1	R10	1	57.00	13.30	49.79	4.84	5.95	5.55
Dixon	V1	R11	1	52.92	17.35	48.19	4.13	5.91	5.56
Dixon	V1	R12	1	53.57	16.80	51.16	4.85	5.88	5.53
Dixon	V1	R13	1	52.42	16.07	49.68	4.42	5.92	5.54
Dixon	V1	R14	1	53.79	16.11	48.19	4.91	5.93	5.54
Dixon	V1	R15	1	55.09	21.15	45.51	5.07	5.94	5.54
Dixon	V1	R16	1	51.40	19.69	50.74	5.21	5.89	5.54
Dixon	V1	R17	1	56.98	17.62	49.82	4.45	5.95	5.53
Dixon	V1	R18	1	54.84	17.68	48.35	4.77	5.91	5.53
Dixon	V1	R19	1	54.58	15.98	51.76	4.84	5.94	5.54
Dixon	V1	R20	1	53.51	16.06	49.99	5.32	5.91	5.55
Early Grande	V2	R1	2	60.82	9.45	40.81	7.04	5.95	5.76
Early Grande	V2	R2	2	59.70	8.71	39.77	6.67	6.32	5.79
Early Grande	V2	R3	2	59.60	10.92	38.22	7.10	6.21	5.79
Early Grande	V2	R4	2	60.76	10.68	39.39	6.75	6.23	5.79
Early Grande	V2	R5	2	61.78	8.95	36.85	6.53	6.26	5.80
Early Grande	V2	R6	2	59.60	9.85	39.53	6.65	6.11	5.81
Early Grande	V2	R7	2	61.08	11.75	38.87	6.54	6.21	5.81
Early Grande	V2	R8	2	60.85	11.62	39.18	6.68	6.05	5.83
Early Grande	V2	R9	2	59.68	8.96	37.91	6.45	6.29	5.79
Early Grande	V2	R10	2	61.48	9.57	41.14	6.78	6.19	5.83
Early Grande	V2	R11	2	58.05	9.98	39.77	6.90	6.13	5.79
Early Grande	V2	R12	2	61.33	8.64	41.94	6.53	6.25	5.76
Early Grande	V2	R13	2	57.12	8.41	38.07	6.89	6.16	5.79
Early Grande	V2	R14	2	59.61	11.21	40.03	6.48	6.05	5.76
Early Grande	V2	R15	2	59.37	9.37	38.26	7.02	6.05	5.78
Early Grande	V2	R16	2	57.55	9.48	38.13	6.31	6.12	5.79
Early Grande	V2	R17	2	59.33	8.32	41.09	6.69	6.01	5.78
Early Grande	V2	R18	2	60.32	10.65	38.01	6.86	6.17	5.82
Early Grande	V2	R19	2	61.26	10.24	39.15	6.75	6.07	5.77
Early Grande	V2	R20	2	61.49	9.34	37.78	6.18	6.10	5.80
Flordaprince	V3	R1	3	47.14	30.13	40.11	6.81	5.73	6.15
Flordaprince	V3	R2	3	48.13	32.74	40.64	7.45	5.69	5.52
Flordaprince	V3	R3	3	45.62	30.33	38.88	7.14	5.67	5.81
Flordaprince	V3	R4	3	47.42	32.00	40.29	7.35	5.78	5.76
Flordaprince	V3	R5	3	46.79	30.87	40.45	7.14	5.72	6.05
Flordaprince	V3	R6	3	46.88	31.78	39.49	6.88	5.77	5.79
Flordaprince	V3	R7	3	49.04	30.53	40.80	6.97	5.72	5.55
Flordaprince	V3	R8	3	47.08	32.39	38.96	7.28	5.75	5.68
Flordaprince	V3	R9	3	45.91	31.02	41.21	7.40	5.73	6.19
Flordaprince	V3	R10	3	43.92	31.19	40.19	6.88	5.78	5.93
Flordaprince	V3	R11	3	45.30	30.84	41.96	7.65	5.75	6.03
Flordaprince	V3	R12	3	47.47	31.31	43.05	7.48	5.67	5.78
Flordaprince	V3	R13	3	45.34	30.28	37.15	7.43	5.68	5.96
Flordaprince	V3	R14	3	46.80	31.19	41.00	7.64	5.71	5.95
Flordaprince	V3	R15	3	48.01	27.69	38.27	7.13	5.71	5.78
Flordaprince	V3	R16	3	47.27	30.45	39.51	7.30	5.73	5.71
Flordaprince	V3	R17	3	47.52	28.47	38.85	7.20	5.68	5.87
Flordaprince	V3	R18	3	47.68	30.47	39.34	7.57	5.62	5.57
Flordaprince	V3	R19	3	45.98	32.06	38.09	7.51	5.75	6.03
Flordaprince	V3	R20	3	48.96	32.53	44.07	7.62	5.71	5.84
Flordastar	V4	R1	4	54.57	27.84	38.42	6.40	5.55	5.73
Flordastar	V4	R2	4	55.44	29.02	37.99	6.54	5.48	5.76
Flordastar	V4	R3	4	56.01	26.40	36.75	6.25	5.72	5.72
Flordastar	V4	R4	4	54.74	28.48	37.41	6.20	5.51	5.75
Flordastar	V4	R5	4	53.78	29.46	41.12	6.18	5.48	5.68
Flordastar	V4	R6	4	56.09	30.38	37.94	6.36	5.47	5.82
Flordastar	V4	R7	4	55.66	30.60	37.13	6.17	5.50	5.83
Flordastar	V4	R8	4	57.38	29.35	38.91	6.24	5.46	5.70
Flordastar	V4	R9	4	55.97	24.96	38.42	6.09	5.49	5.73
Flordastar	V4	R10	4	56.05	30.98	39.50	6.29	5.50	5.78
Flordastar	V4	R11	4	56.41	28.99	37.98	6.28	5.49	5.86
Flordastar	V4	R12	4	56.96	28.34	34.25	6.22	5.45	5.79
Flordastar	V4	R13	4	54.96	27.49	40.63	6.07	5.44	5.81
Flordastar	V4	R14	4	56.24	29.39	37.30	6.39	5.41	5.84
Flordastar	V4	R15	4	53.67	27.86	39.96	6.22	5.49	5.87
Flordastar	V4	R16	4	56.92	30.20	38.91	6.39	5.58	5.90
Flordastar	V4	R17	4	58.63	26.09	38.63	6.12	5.62	5.81
Flordastar	V4	R18	4	56.90	29.43	38.95	6.35	5.70	5.72
Flordastar	V4	R19	4	54.20	27.46	39.91	6.58	5.45	5.75
Flordastar	V4	R20	4	55.09	27.74	38.03	6.24	5.48	5.94
Flordaglo	V5	R1	5	51.96	28.01	40.79	6.55	6.16	5.80
Flordaglo	V5	R2	5	51.68	23.95	38.92	6.46	6.17	5.86
Flordaglo	V5	R3	5	53.08	25.74	38.90	6.47	6.10	5.95
Flordaglo	V5	R4	5	52.28	27.01	37.89	6.62	6.11	5.95
Flordaglo	V5	R5	5	53.12	27.54	38.82	6.24	6.14	5.82
Flordaglo	V5	R6	5	50.98	24.16	37.98	6.45	6.10	5.92
Flordaglo	V5	R7	5	51.69	29.81	40.05	6.61	6.14	5.81
Flordaglo	V5	R8	5	50.27	27.14	38.42	6.53	6.16	5.97
Flordaglo	V5	R9	5	49.91	27.10	38.32	6.51	6.13	5.87
Flordaglo	V5	R10	5	51.85	27.89	38.44	6.45	6.07	5.78
Flordaglo	V5	R11	5	51.07	27.01	39.74	6.50	6.07	5.78
Flordaglo	V5	R12	5	52.16	26.91	38.55	6.32	6.10	5.95
Flordaglo	V5	R13	5	52.13	27.80	38.85	6.40	6.07	5.92
Flordaglo	V5	R14	5	53.05	29.43	38.18	6.43	6.19	5.81
Flordaglo	V5	R15	5	50.79	28.37	37.86	6.59	6.11	5.85
Flordaglo	V5	R16	5	52.70	28.53	38.46	6.47	6.03	5.84
Flordaglo	V5	R17	5	53.41	25.13	39.07	6.52	6.10	5.95
Flordaglo	V5	R18	5	50.04	27.15	38.29	6.32	6.11	5.89
Flordaglo	V5	R19	5	52.30	27.70	38.82	6.65	6.13	5.91
Flordaglo	V5	R20	5	50.04	25.77	38.97	6.54	6.11	5.79
Florda 834	V6	R1	6	44.98	30.72	32.15	8.54	6.03	5.95
Florda 834	V6	R2	6	44.95	29.51	32.14	8.64	6.02	5.88
Florda 834	V6	R3	6	45.01	30.32	32.10	8.60	6.03	5.85
Florda 834	V6	R4	6	44.88	30.72	32.28	7.78	6.04	5.93
Florda 834	V6	R5	6	44.64	28.80	32.15	7.86	6.04	5.89
Florda 834	V6	R6	6	45.36	27.63	32.29	8.53	6.03	5.89
Florda 834	V6	R7	6	44.86	29.55	32.21	8.10	6.01	5.98
Florda 834	V6	R8	6	44.65	29.26	32.37	7.79	6.05	5.91
Florda 834	V6	R9	6	45.84	31.53	32.26	8.39	6.02	6.11
Florda 834	V6	R10	6	44.68	28.21	32.08	8.22	6.03	5.90
Florda 834	V6	R11	6	44.94	30.35	32.03	7.97	6.05	6.01
Florda 834	V6	R12	6	45.36	29.37	32.61	8.00	6.01	5.89
Florda 834	V6	R13	6	45.04	28.31	32.03	8.02	6.01	5.88
Florda 834	V6	R14	6	45.29	30.12	32.45	8.74	6.04	5.90
Florda 834	V6	R15	6	45.41	31.02	32.15	8.14	5.98	5.95
Florda 834	V6	R16	6	44.47	31.02	32.06	8.36	6.03	5.96
Florda 834	V6	R17	6	44.82	30.78	32.33	7.73	6.01	6.07
Florda 834	V6	R18	6	45.27	29.79	32.39	7.90	6.01	5.90
Florda 834	V6	R19	6	45.47	31.62	32.29	8.06	6.03	5.96
Florda 834	V6	R20	6	45.48	30.30	32.29	8.00	6.00	5.87
TropicSnow	V7	R1	7	49.00	22.16	36.95	12.03	6.47	6.28
TropicSnow	V7	R2	7	46.51	22.41	38.65	12.21	6.31	6.39
TropicSnow	V7	R3	7	46.98	22.10	33.44	12.19	6.46	6.30
TropicSnow	V7	R4	7	50.26	23.63	38.16	12.14	6.37	6.29
TropicSnow	V7	R5	7	48.13	23.73	37.35	12.12	6.40	6.43
TropicSnow	V7	R6	7	46.81	22.96	36.48	12.25	6.33	6.43
TropicSnow	V7	R7	7	48.70	22.76	38.26	12.08	6.43	6.22
TropicSnow	V7	R8	7	48.52	22.87	39.51	12.21	6.46	6.32
TropicSnow	V7	R9	7	47.17	20.47	39.70	12.19	6.38	6.36
TropicSnow	V7	R10	7	48.70	23.54	37.31	12.16	6.39	6.20
TropicSnow	V7	R11	7	47.84	22.46	33.91	12.04	6.35	6.47
TropicSnow	V7	R12	7	45.50	22.98	35.61	12.21	6.21	6.49
TropicSnow	V7	R13	7	47.28	23.65	35.63	12.23	6.39	6.16
TropicSnow	V7	R14	7	45.60	24.08	37.63	12.06	6.38	6.32
TropicSnow	V7	R15	7	46.07	22.25	33.20	12.22	6.40	6.28
TropicSnow	V7	R16	7	50.62	24.14	38.71	12.12	6.45	6.02
TropicSnow	V7	R17	7	47.62	23.06	37.27	12.27	6.36	6.34
TropicSnow	V7	R18	7	46.44	21.57	38.83	12.17	6.42	6.29
TropicSnow	V7	R19	7	47.65	24.47	37.93	12.21	6.43	6.06
TropicSnow	V7	R20	7	49.37	25.53	36.19	12.18	6.41	6.48
Desertred	V8	R1	8	36.59	39.47	36.49	11.61	6.47	6.70
Desertred	V8	R2	8	36.59	39.03	38.71	12.23	5.96	6.44
Desertred	V8	R3	8	36.89	39.01	37.14	11.28	6.97	6.52
Desertred	V8	R4	8	36.87	39.29	37.69	12.31	6.24	6.63
Desertred	V8	R5	8	36.95	40.56	37.42	11.19	6.20	6.48
Desertred	V8	R6	8	36.82	39.77	37.38	11.88	5.98	6.41
Desertred	V8	R7	8	36.44	40.24	38.55	10.88	6.50	6.52
Desertred	V8	R8	8	36.79	41.23	36.68	12.15	6.53	6.64
Desertred	V8	R9	8	36.98	39.68	37.71	10.46	6.64	6.37
Desertred	V8	R10	8	36.79	40.78	38.42	10.97	6.46	6.76
Desertred	V8	R11	8	36.53	40.19	38.22	10.79	6.65	6.69
Desertred	V8	R12	8	36.77	40.46	39.04	12.03	6.36	6.51
Desertred	V8	R13	8	36.91	40.09	37.36	11.64	6.40	6.34
Desertred	V8	R14	8	37.00	38.13	38.51	11.95	6.22	6.49
Desertred	V8	R15	8	36.73	39.74	39.63	11.46	6.38	6.41
Desertred	V8	R16	8	36.57	39.05	38.12	9.91	6.73	6.36
Desertred	V8	R17	8	36.72	38.77	38.26	10.98	6.54	6.55
Desertred	V8	R18	8	36.77	37.76	38.73	12.46	6.66	6.42
Desertred	V8	R19	8	36.80	40.40	39.37	13.22	6.22	6.24
Desertred	V8	R20	8	36.60	40.55	38.61	10.23	6.39	6.58
Swelling	V9	R1	9	58.48	18.08	33.24	11.56	5.69	5.84
Swelling	V9	R2	9	56.92	15.58	27.79	12.30	5.72	5.84
Swelling	V9	R3	9	56.84	16.25	32.76	11.87	5.78	5.85
Swelling	V9	R4	9	57.29	15.76	30.88	12.61	5.70	5.98
Swelling	V9	R5	9	56.20	16.19	32.05	11.64	5.75	5.74
Swelling	V9	R6	9	58.85	16.23	30.16	11.80	5.86	5.88
Swelling	V9	R7	9	57.53	15.99	33.00	12.21	5.82	5.92
Swelling	V9	R8	9	58.10	16.84	29.84	11.99	5.78	5.91
Swelling	V9	R9	9	56.10	16.11	31.68	11.44	5.71	5.84
Swelling	V9	R10	9	55.69	17.38	31.20	12.47	5.79	5.81
Swelling	V9	R11	9	56.85	18.30	29.95	12.65	5.67	5.91
Swelling	V9	R12	9	58.07	15.52	30.62	11.54	5.71	5.77
Swelling	V9	R13	9	56.34	17.50	33.60	11.23	5.77	5.85
Swelling	V9	R14	9	56.36	17.69	30.60	12.49	5.80	5.90
Swelling	V9	R15	9	57.31	15.66	32.47	11.68	5.76	5.79
Swelling	V9	R16	9	58.53	16.33	32.21	12.98	5.78	5.79
Swelling	V9	R17	9	56.13	16.69	33.14	12.21	5.64	5.87
Swelling	V9	R18	9	56.26	14.06	31.04	11.96	5.70	5.86
Swelling	V9	R19	9	56.42	14.66	30.00	12.70	5.83	5.85
Swelling	V9	R20	9	56.80	16.11	33.02	12.01	5.71	5.78
